# Supplementary material
Source: PubMed Central journal article supplement (PMC4503931)
Supplement: NIHMS680123-supplement-Supp_Material.pdf [file NIHMS680123-supplement-Supp_Material.pdf]

# **PATHOGENESIS AND MECHANISMS OF IMMUNE HEMOLYTIC ANEMIA**

**George Garratty, PhD, FRCPath.  
Scientific Director**

**American Red Cross Blood Services  
Southern California Region**

**[george.garratty@redcross.org](mailto:george.garratty@redcross.org)**

# **IMMUNE DESTRUCTION OF CIRCULATING BLOOD CELLS**

- **Intravascular complement-mediated destruction usually initiated by antibody**
- **Extravascular macrophage-mediated destruction: antibody (IgG, IgA), complement (C3b, iC3b), antibody + complement**

# Hemolysis

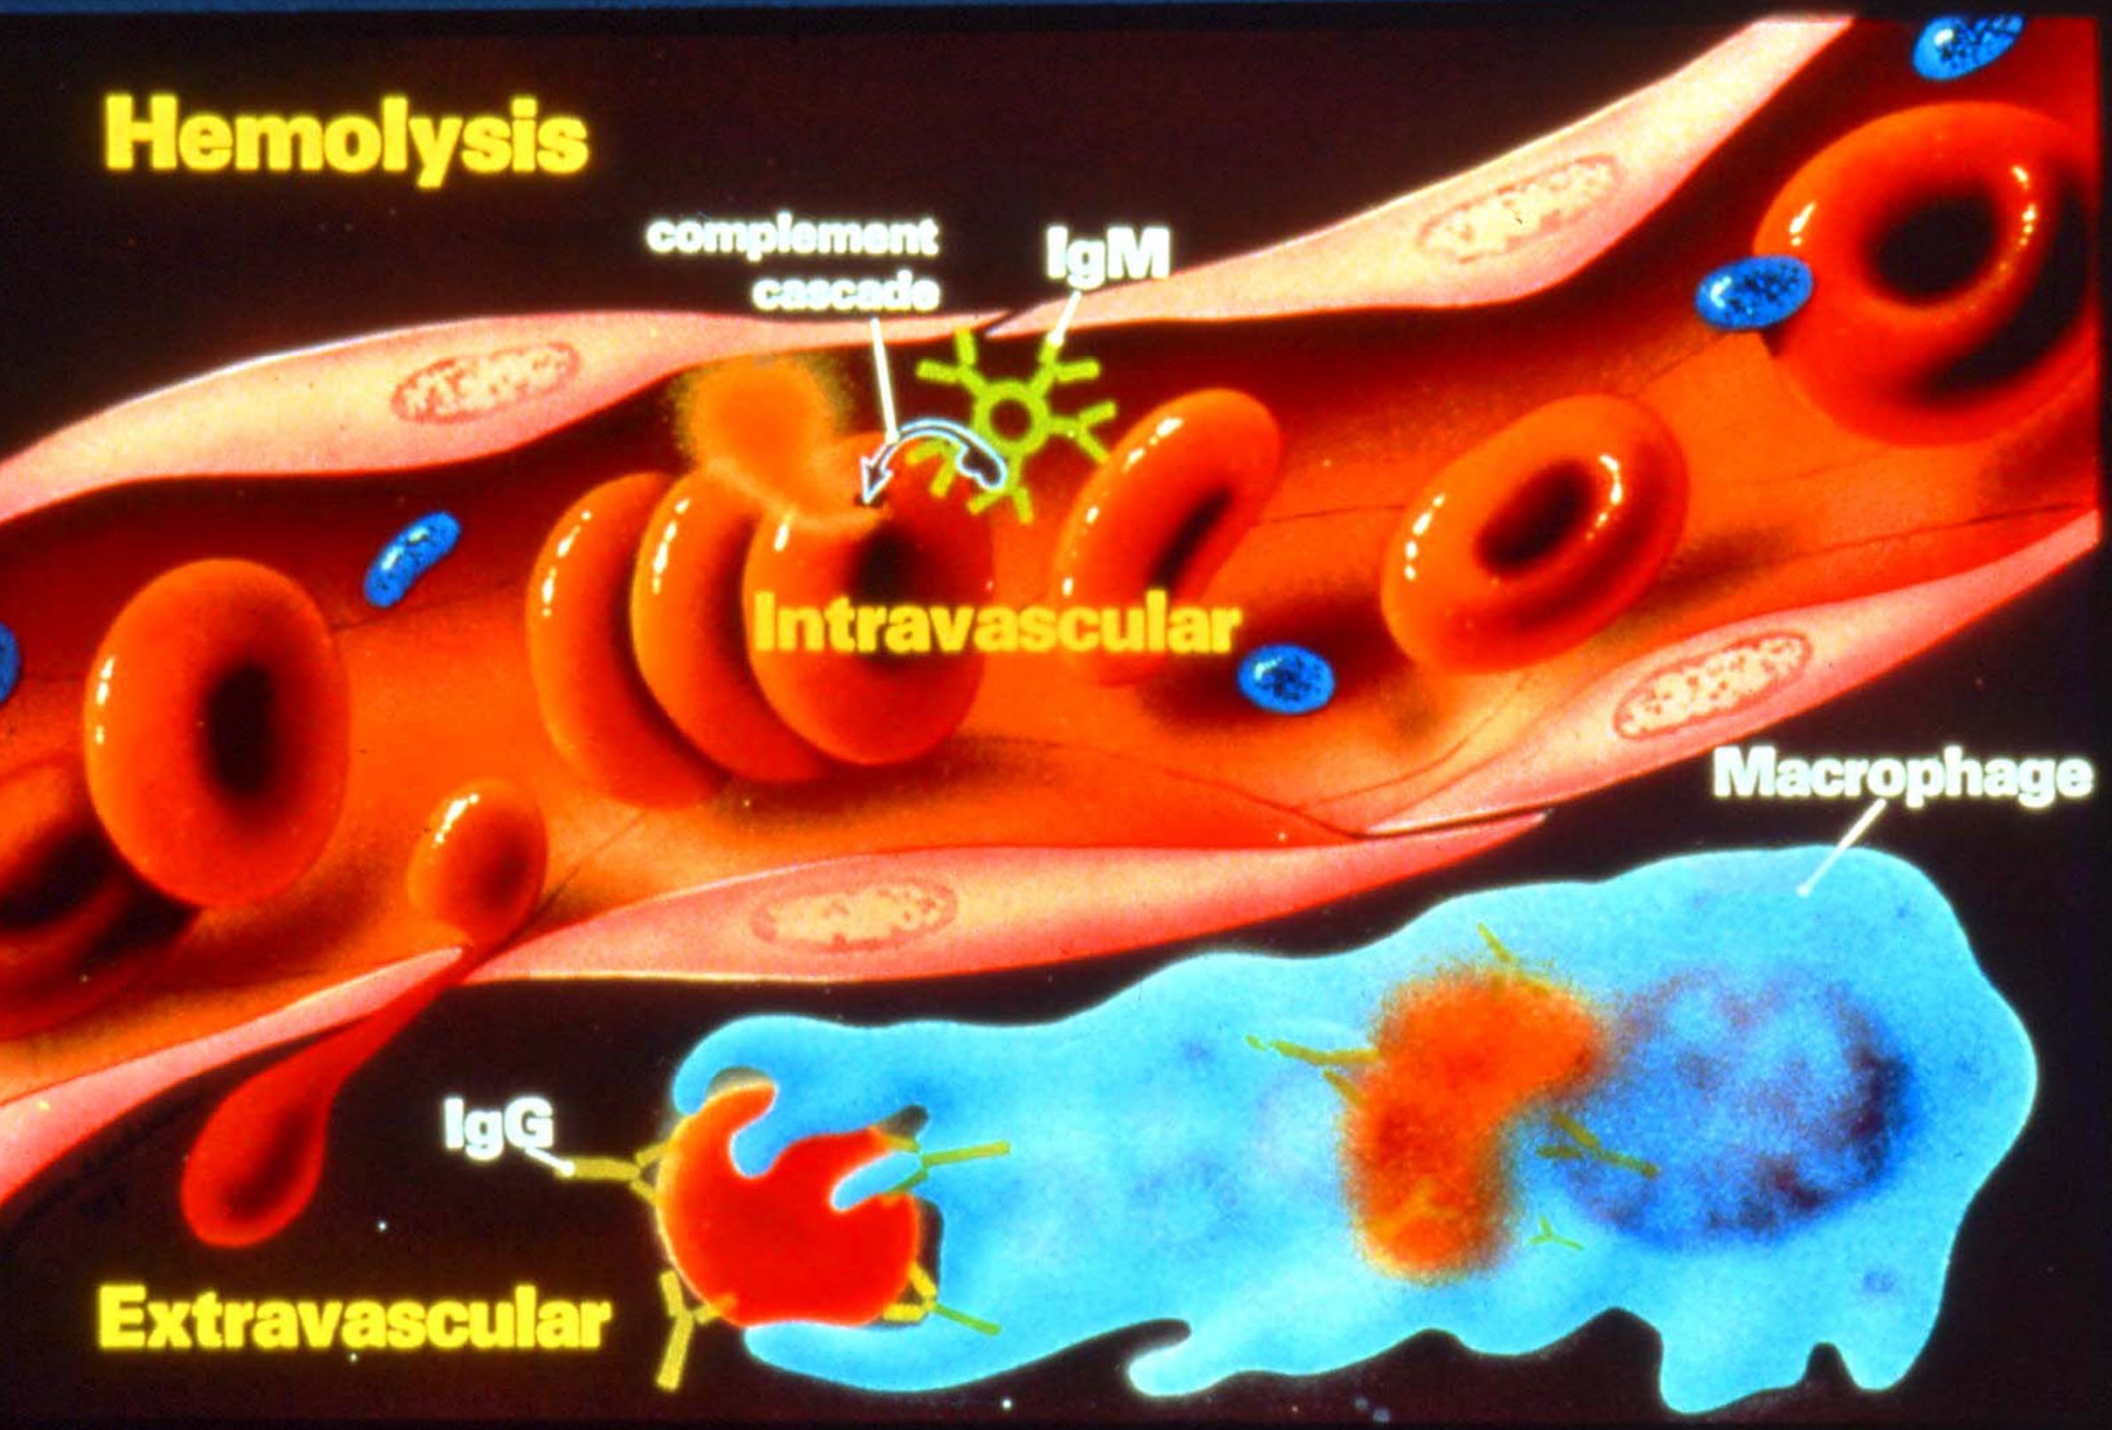

# **MAXIMUM RATE OF RBC DESTRUCTION (Mollison et al 1997, pg 341)**

## **Extravascular**

**0.25 ml RBCs/kg/hr**

**∴ 70 kg patient = 17.5 ml RBCs/hr  
= 420 ml RBCs/24 hr**

## **Intravascular**

**e.g., anti-A/B can destroy 200 ml  
RBCs in 1 hr**

# RECEPTORS ON MACROPHAGES AND MONOCYTES

**Fc: IgG1, IgG3, (IgG2), IgA**

**CR1: C3b, iC3b**

**CR3: iC3b**

**CR4: iC3b (C3dg, C3d)**



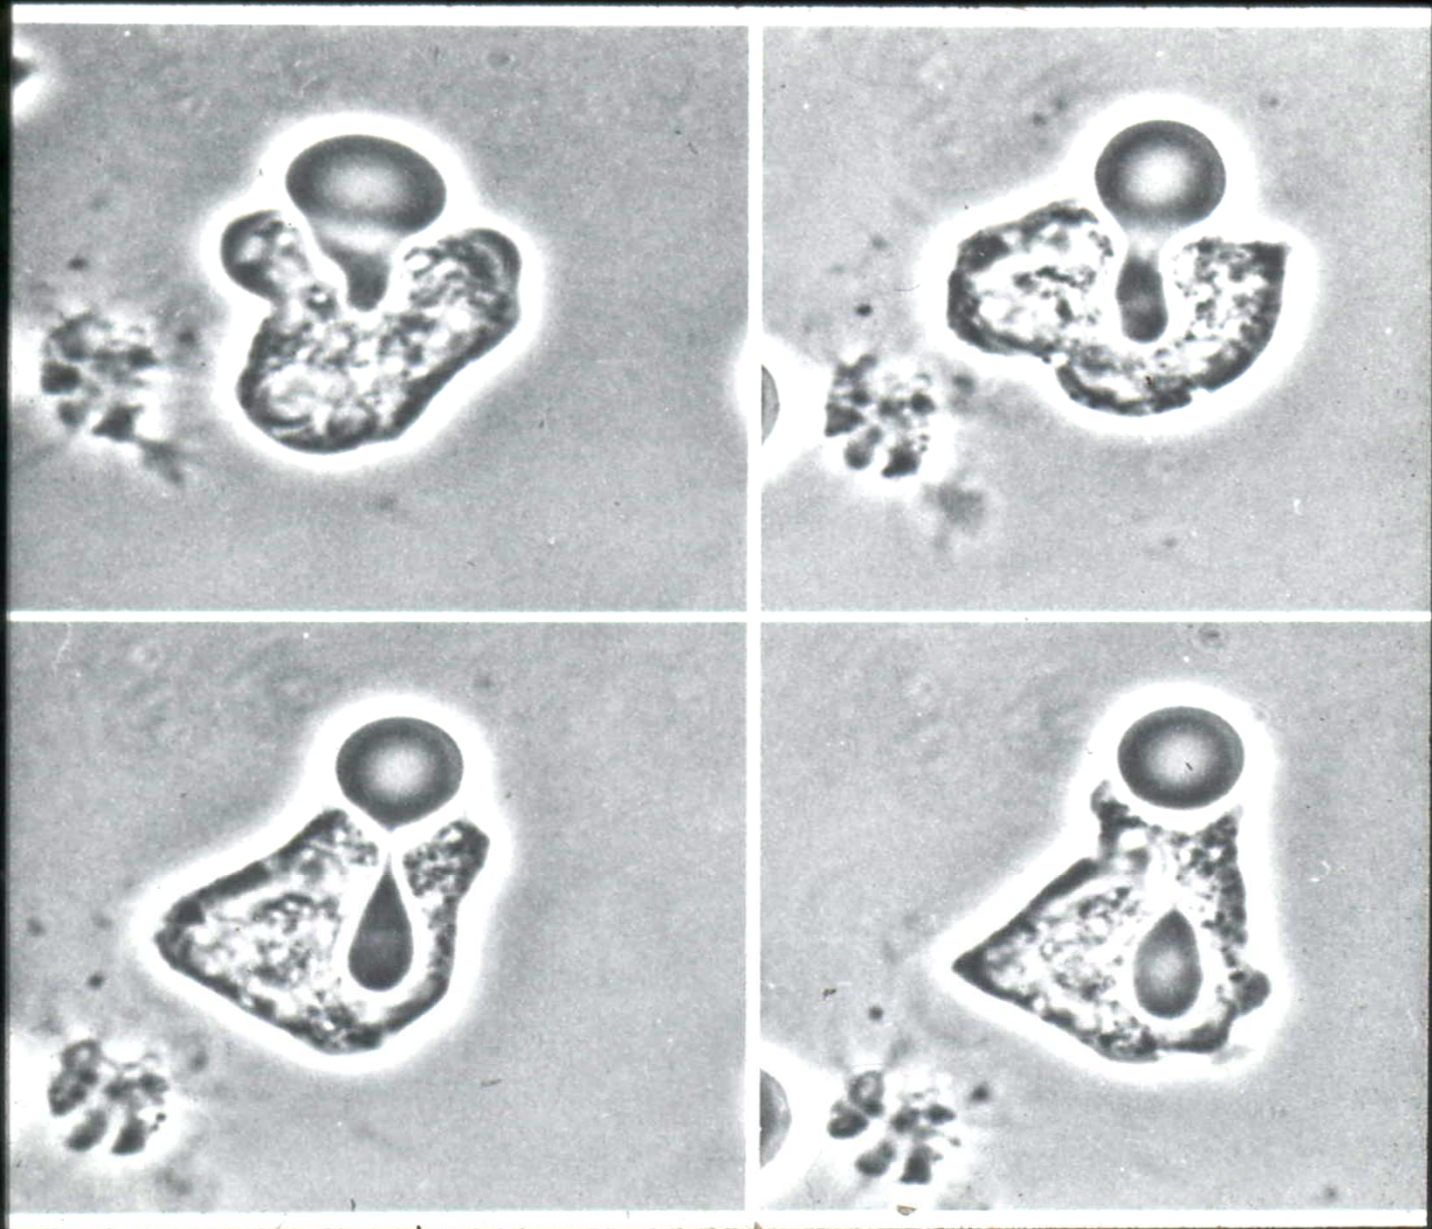

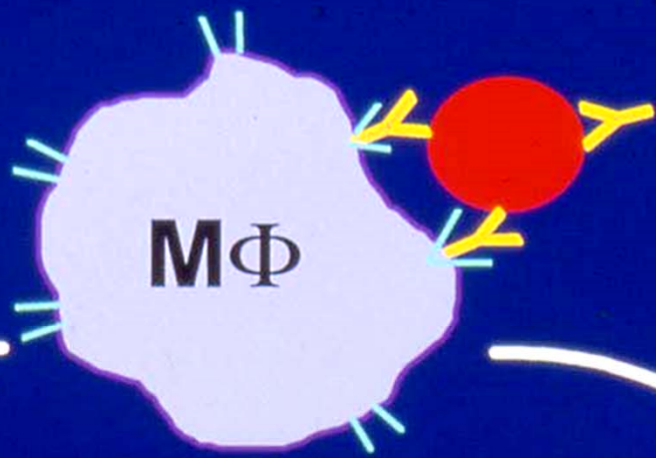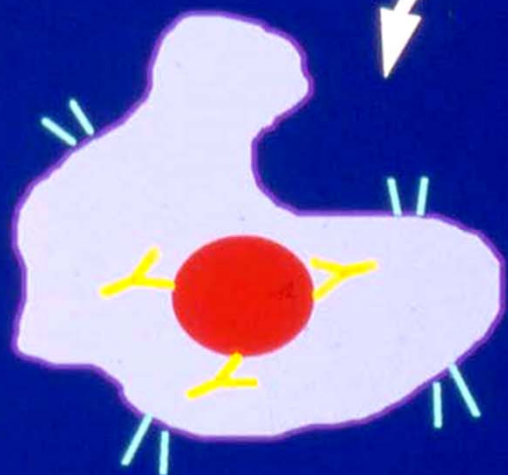

**PHAGOCYTOSIS**

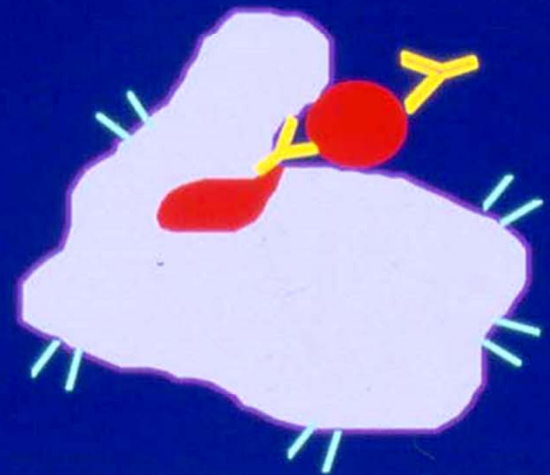

**FRAGMENTATION  
→ SPHEROCYTES**

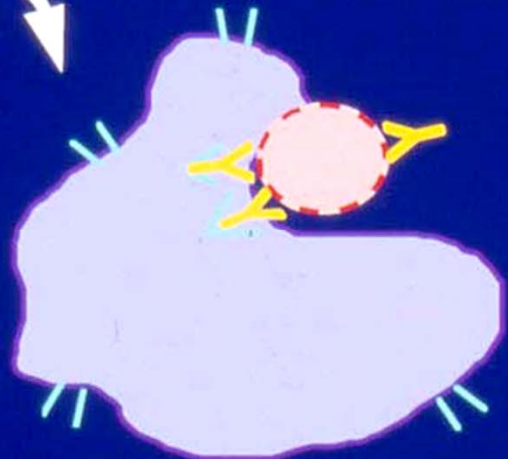

**CYTOTOXICITY  
(ADCC)**

# **FACTORS THAT INFLUENCE THE PATHOGENICITY OF RBC ANTIBODIES**

- **Characteristics of antibody**
- **Quantity of RBC-bound IgG/complement**
- **Characteristics of target antigen**
- **Type of complement present on RBCs**
- **Activity of reticuloendothelial system**



# **CHARACTERISTICS OF ANTIBODY THAT INFLUENCE PATHOGENICITY OF RBC ANTIBODIES**

- **Class**
- **Subclass**
- **Specificity**
- **Thermal range**
- **Complement activating efficiency**
- **Affinity**

# **CHARACTERISTICS OF ANTIGEN THAT INFLUENCE PATHOGENICITY OF RBC ANTIBODIES**

- **Chemistry of target antigen**
- **Quantity of antigen on membrane**
- **Distribution of antigen on membrane**
- **Antigen in tissues and/or body fluids (competition)**

# **SIGNIFICANCE OF RBC-BOUND COMPLEMENT COMPONENTS**

- **Intravascular lysis**
- **Sequestration in reticuloendothelial system with subsequent phagocytosis**
- **Temporary sequestration with normal or shortened RBC survival**
- **Essentially normal survival**

# ABNORMAL MACROPHAGE ACTIVITY

## HYPERACTIVE

- Infection
- AIHA, SCD, thalassemia
- cytokines (INF $\gamma$ , IL6)

## HYPOACTIVE

- Fc receptors blocked with:  
immune complexes (e.g., SLE)  
maternal anti-HLA (fetal MPs)
- ? Drugs (e.g., methyldopa)



**A RETROSPECTIVE ANALYSIS OF  
THE VALUE OF MONOCYTE  
MONOLAYER ASSAY RESULTS  
FOR PREDICTING THE CLINICAL  
SIGNIFICANCE OF BLOOD GROUP  
ALLOANTIBODIES.**

**Arndt PA, Garratty G.  
Transfusion 2004;44:1273-81**

# DELAYED HEMOLYTIC TRANSFUSION REACTIONS (DHTRs) VS. DELAYED SEROLOGICAL TRANSFUSION REACTIONS (DSTRs) AT MAYO CLINIC (1980-1998)

| <u>Specificity</u>                                                                         | <u>DHTR</u>      | <u>DSTR</u>      |
|--------------------------------------------------------------------------------------------|------------------|------------------|
| E                                                                                          | 47               | 137              |
| Jk <sup>a</sup>                                                                            | 45               | 50               |
| Fy <sup>a</sup>                                                                            | 26               | 36               |
| c                                                                                          | 18               | 36               |
| K                                                                                          | 16               | 46               |
| Jk <sup>b</sup>                                                                            | 12               | 15               |
| C                                                                                          | 8                | 14               |
| Fy <sup>b</sup>                                                                            | 4                | 8                |
| S                                                                                          | 4                | 3                |
| e                                                                                          | 3                | 9                |
| C <sup>w</sup>                                                                             | 3                | 2                |
| A <sub>1</sub> , Yt <sup>a</sup> , Kp <sup>a</sup> , Lu <sup>a</sup> , Lu <sup>b</sup> , D | 6                | 1                |
| M, Js <sup>a</sup> , V, G, P <sub>1</sub> , Co <sup>b</sup>                                | 0                | 9                |
| <b>TOTAL</b>                                                                               | <b>182 (33%)</b> | <b>366 (67%)</b> |

## **PATIENTS RECEIVING ABO INCOMPATIBLE BLOOD MEANT FOR ANOTHER PATIENT**

- **Linden et al: Transfusion errors in New York State: an analysis of 10 years' experience. Transfusion 2000;40:1207**
  - 47% of 237 patients reported as “no adverse effect”
- **Robillard et al: Trends in red cell-associated ABO mistransfusions, acute and delayed serologic transfusion reactions in the Quebec Hemovigilance System: 2000-2003. Transfusion 2004;44:17A (abstr)**
  - 46% of 24 patients reported as “asymptomatic”

# CLINICAL OUTCOMES OF ABO-INCOMPATIBLE TRANSFUSIONS

(Janatpour et al, Am J Clin Pathol 2008;129:276)

|                                                | ≤50 mL         | >50 mL          |
|------------------------------------------------|----------------|-----------------|
| <b>No. of Patients</b>                         | <b>12</b>      | <b>36</b>       |
| <b>Survived</b>                                | <b>12</b>      | <b>30</b>       |
| <b>Died</b>                                    | <b>0</b>       | <b>6 (20%)</b>  |
| <b>Patients without signs or symptoms</b>      | <b>9 (75%)</b> | <b>13 (36%)</b> |
| <b>Patients with signs or symptoms</b>         | <b>3</b>       | <b>23</b>       |
| <b>Acute hemolytic transfusion reaction</b>    | <b>3</b>       | <b>16</b>       |
| <b>Renal failure</b>                           | <b>0</b>       | <b>10 (28%)</b> |
| <b>Shock</b>                                   | <b>1</b>       | <b>3</b>        |
| <b>Disseminated intravascular coagulopathy</b> | <b>0</b>       | <b>3</b>        |



**THE JAMES BLUNDELL AWARD  
LECTURE 2007: DO WE REALLY  
UNDERSTAND IMMUNE RED  
CELL DESTRUCTION?**

**Garratty G. Transfus Med Rev  
2008;18:321-34**

# QUESTIONS STILL TO BE ANSWERED

- **Why do circulating RBCs die after 110 – 120 days ? [autoantibody; sialic acid; phosphatidylserine; apoptosis (eryptosis)]**
- **Why do RBCs strongly coated with IgG1 or IgG3 sometimes survive normally?**
- **Why do ABO incompatible transfusions sometimes not cause severe reactions?**

# **QUESTIONS STILL TO BE ANSWERED**

- **Why are some auto and alloantibodies causing severe immune hemolytic anemia not detected by routine techniques?**
- **Can T (cytotoxic) lymphocytes, NK cells, granulocytes, dendritic cells participate in immune hemolysis?**
- **Do differences in clinical severity and response to treatment relate to relative efficiency of macrophage-induced phagocytosis versus cytotoxicity?**

# QUESTIONS STILL TO BE ANSWERED

- **Why do hyperhemolytic HTRs occur in sickle cell disease?**
- **Can antibodies cause IHA without activating complement or interaction with macrophage Fc/receptors?**
- **How do we predict the clinical significance of a RBC antibody?**
- **How should we define "clinical significance"?**



# POSSIBLE NOVEL MECHANISMS FOR IMMUNE DESTRUCTION OF RBCs AND PLATELETS

- Bystander / reactive lysis
- Immune complexes
- “Armed” macrophages
- Antibody independent cell-mediated cytotoxicity (NK cells)
- Antibody activation of platelets can lead to RBC lysis
- Antibody generated ozone /H<sub>2</sub>O<sub>2</sub> → lysis

# **POSSIBLE NOVEL MECHANISMS FOR IMMUNE DESTRUCTION OF RBCs AND PLATELETS**

- **Antibodies to antigens on GPA can change the RBC membrane → channels allowing  $\text{Ca}^{2+}$  to enter RBCs plus appearance of phosphatidylserine on membrane**
- **Agglutinins can sometimes sequester in spleen/liver → HA without Fc or complement involvement**

- **Baudino et al. IgM and IgA anti-erythrocyte autoantibodies induce anemia in a mouse model through multivalency-dependent hemagglutination but not through complement activation. Blood 2007;109:5355-62.**
- **Liepkaļns et al. Biphasic clearance of incompatible red blood cells through a novel mechanism requiring neither complement nor Fc gamma receptors in a murine model. Transfusion 2012;52:2631-45.**

- **Chadebech et al. IgA-mediated human autoimmune hemolytic anemia as a result of hemagglutination in the spleen, but independent of complement activation and Fc $\alpha$ R1. Blood 2010;116:4141-7.**

## **PERSONAL OPINIONS**

- **Most HTRs associated with IVIG are due to ABO alloantibodies**
- **Although reducing the titer of anti-A and anti-B will help lower the number of cases with HA there will still be a few cases associated with low titer antibodies**
- **The only way to stop the HTRs is to have no anti-A/-B in products**
